# Supplementary material for: Host and bacterial factors that regulate LC3 recruitment to Listeria monocytogenes during the early stages of macrophage infection
Source: PubMed Central journal article supplement — Autophagy. 2013 Apr 12;9(7):985–95. doi: 10.4161/auto.24406 (PMC3722333; doi:10.4161/auto.24406), 2013-04-12
Supplement: auto-9-985-s01.pdf [file auto-9-985-s01.pdf]

## **Supplemental Material to:**

**Grace Y. Lam, Marija Cemma, Aleixo M. Muise,  
Darren E. Higgins and John H. Brumell**

**Host and bacterial factors that regulate LC3 recruitment  
to *Listeria monocytogenes* during the early stages  
of macrophage infection**

**Autophagy 2013; 9(7)**

**<http://dx.doi.org/10.4161/auto.24406>**

**[www.landesbioscience.com/journals/autophagy/article/24406](http://www.landesbioscience.com/journals/autophagy/article/24406)**

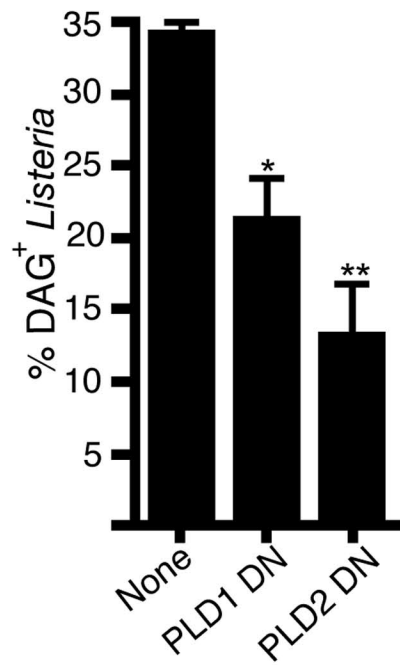

**Figure S1.** Quantification at 1h p.i. of DAG<sup>+</sup> intracellular PI-PLCΔ PC-PLCΔ *L. monocytogenes* in RAW 264.7 macrophages that were cotransfected with GFP-LC3 and either PLD1 DN or PLD2 DN constructs.
